# Supplementary material
Source: Royal Society of Chemistry journal article supplement (https://www.rsc.org/suppdata/dt/1999/4047/906624a.doc)
Supplement: Supplementary file 1 [file 906624a.doc]

#### Electronic Supplementary Information

## General Procedures

All reactions were carried out under an atmosphere of dry oxygen-free dinitrogen, using standard Schlenk techniques. Solvents were freshly distilled over an appropriate drying agent and further degassed before use where necessary. In some cases the reactions were protected from light by covering reaction vessels with aluminum foil. Concentration was always carried out *in vacuo* (water aspirator). The samples for microanalysis were dried *in vacuo* to constant weight (20° C, *ca* 0.1 Torr). Elemental analyses (C,H,N) were performed in house with a Carlo-Erba model 1106 instrument. IR spectra were recorded from 4000 to 100 cm-1 with a Perkin-Elmer System 2000 FT-IR instrument. 1H, 13C and 31P spectra were recorded on a VXR-300 Varian spectrometer operating at room temperature (300 MHz for 1H, 75 MHz for 13C and 121.4 MHz for 31P). The electrical resistance of acetone solutions was measured with a Crison CDTM 522 conductimeter at room temperature. The osmometric measurements were carried out at 40° C over a range of concentrations with a Knauer KNA0280 vapor pressure osmometer calibrated with benzil. The solvent was Baker Analyzed Spectrophotometric grade chloroform. The results were reproducible to ± 2%.

### Synthesis of complexes

**[Ag(PPh3)4](NO3)**. This compound, well described in the literature,24 can be prepared also by the following procedure: silver(I) nitrate (1.698 g, 10 mmol) was added to a warm ethanol solution (100 ml) of Ph3P (10.492 g, 40 mmol). After 2 h the warm clear solution was allowed to cool slowly in the dark to give well formed crystals of [Ag(PPh3)4](NO3) (10.12 g, 83% yield). Mp 218-220° C. 1H NMR (CDCl3, 293K):  7.20-7.5 (m br, 60H, C6*H*5). 31P NMR (CDCl3, 293K):  4.0s (br). 31P NMR (CDCl3, 223K):  5.7 d (1J(Ag,31P) = 238 Hz). IR (nujol, cm-1): 3046w (CH), 1970m, 1891m, 1814m, 1774m, 1340sh, 830m (NO3) 512s, 499s, 437m, 428w (Ph). Anal. Calcd for C72H60AgNO3P4: C, 70.9; H, 5.0; N, 1.1%. Found: C, 70.4; H, 5.1; N, 1.1%.

**[(Cy3P)2Ag(O2NO)]**. This compound, previously described in the literature,29 was obtained similarly to [Ag(PPh3)4](NO3) by using Cy3P (5.0 g, 17.8 mmol) and AgNO3 (0.76 g, 4.6 mmol) (93% yield). Mp 234-235° C 1H NMR (CDCl3, 293K):  1.2-1.8 (m br, 66H, C6*H*11). 31P NMR (CDCl3, 293K):  32.4dd (1J(109Ag,31P) = 527 Hz, 1J(107Ag,31P) = 456 Hz). IR (nujol, cm-1): 1749w, 1738w, 1734w, 1294s (br) 752m, 734m, 704w (NO3), 512br, 467m (Cy). Anal. Calcd for C36H99AgNO3P2: C, 59.2; H, 9.1; N, 1.9%. Found: C, 59.6; H, 9.5; N, 2.1%.

**[Ag(Ph3P)4](F3CCO2).H2O**. This compound was obtained similarly to [Ag(PPh3)4]NO3 by using Ph3P (10.492 g, 40 mmol) and AgCF3CO2 (2.2 g, 10 mmol) (88% yield). Mp 214-217° C. 1H NMR (CDCl3, 293K):  7.3 (m br, 60H, C6*H*5). 31P NMR (CDCl3, 293K):  3.4br. 31P NMR (CDCl3, 223K):  5.6d (1J(Ag,31P) = 239 Hz). IR (nujol, cm-1): 3300br (H2O); 1645m (H2O), 1684s, 1435m (CF3COO), 511s, 495s (br), 432m (Ph). Anal. Calcd for C74H62AgF3O3P4: C, 69.0; H, 4.9%. Found: C, 68.9; H, 5.2%.

**[Ag(PPh3)4](ClO4)**. This compound, previously described in the literature,27,30 was obtained similarly to [Ag(PPh3)4](NO3) by using Ph3P (5.246 g, 20 mmol) and AgClO4 (1.035 g, 5 mmol) (84% yield). Mp 266-270° C. 1H NMR (CDCl3, 293K):  7.3 (m br, 60H, C6*H*5). 31P NMR (CDCl3, 293K):  4.0s (br). 31P NMR (CDCl3, 223K):  5.7 d (1J(Ag,31P) = 238 Hz). IR (nujol, cm-1): 1088s (br), 1024m, 998m (ClO4), 514s, 498s, 437m, 427m (Ph). Anal. Calcd for C72H60AgClO4P4: C, 68.8; H, 4.8%. Found: C, 68.4; H, 5.1%.

**[Ag(PPh3)4](BF4)**. This compound was obtained similarly to [Ag(PPh3)4]NO3 by using PPh3 (10.48 g, 40 mmol) and AgBF4 (1.94 g, 10 mmol) (92% yield). Mp 294-297° C. 1H NMR (CDCl3, 293K):  7.3-7.5 (m br, 60H, C6*H*5). 31P NMR (CDCl3, 293K):  7.3br. 31P NMR (CDCl3, 223K):  5.6 dd (1J(Ag,31P) =238 Hz). IR (nujol, cm-1): 1053s, 541m (BF4), 512s, 499s, 437m, 426m (Ph). Anal. Calcd for C72H60AgBF4P4: C, 69.5; H, 4.9%. Found: C, 69.2; H, 5.2%.

**[(Ph3P)Ag(O2N)]**. Silver(I) nitrite (1.54 g, 10 mmol) was added to a warm ethanol solution (100 ml) of Ph3P (2.62 g, 10 mmol). After 24 h the warm clear solution was allowed to cool slowly in the dark to give well formed crystals of [(Ph3P)Ag(O2N)] (2.08 g, 50 % yield). Mp 156-157° C. 1H NMR (CDCl3, 293K):  7.26-7.50 (m br, 15H, C6*H*5). 31P NMR (CDCl3, 293K):  12.2s (br). 31P NMR (CDCl3, 203K):  15.8 dd (1J(109Ag,31P) = 768 Hz, 1J(107Ag,31P) = 666 Hz). IR (nujol, cm-1): 3060w (CH), 1308m, 1204m, 838m (NO3) 522s, 500s, 488s, 436m (Ph). Anal. Calcd for C18H15AgNO2P: C, 51.9; H, 3.6; N, 3.4%. Found: C, 52.0; H, 3.8; N, 3.4%.

**[(Ph3P)Ag(SO3CH3)].H2O**. Silver(I) methanesulfonate (2.02 g, 10 mmol) was added to a warm ethanol solution (100 ml) of Ph3P (2.62 g, 10 mmol). After 24 h the warm clear solution was allowed to cool slowly in the dark to give well formed crystals of [(Ph3P)Ag(OS3CH3)].H2O (4.35 g, 90 % yield). Mp 199-203° C. 1H NMR (CDCl3, 293K):  1.3 (br, 2H, *H2*O), 2.87 (s, 3H, C*H3*), 7.25-7.55 (m br, 15H, C6*H*5). 31P NMR (CDCl3, 293K):  14.9 (br). 31P NMR (CDCl3, 218K):  15.3 dd (br) (1J(Ag,31P) = 718 Hz). IR (nujol, cm-1): 3155w, 3125w (CH), 2650-2350 br (OH) 1198m, 1168m, 1149m (SO3) 515s, 501s, 440sh, 432m 436m (Ph). Anal. Calcd for C19H20AgO4PS: C, 47.2; H, 4.2; S, 6.6%. Found: C, 47.3; H, 4.4; N, 6.8%.

**[(Ph3P)3Ag(4-Ph-im)](NO3) 1**. 4-Phenylimidazole (4-Ph-im) (0.144 g, 1.0 mmol) was added to a diethyl ether suspension (100 ml) of [Ag(PPh3)4](NO3) (1.219 g, 1.0 mmol). After 72 h stirring, the solid was filtered and washed with diethyl ether, affording compound **1**, which was recrystallised from CHCl3/Et2O (3/1) (50% yield). Mp170-173° C dec. 1H NMR (CDCl3, 293K):  3.5 (br, 1H, NH), 7.2-7.5 (m br, 49H, C6*H*5 and 5-C*H*), 7.7 (d, 2H, C6*H5*), 7.8 (s, 1H, 2-C*H*). 31P NMR (CDCl3, 293K):  6.12. 31P NMR (CDCl3, 223K):  6.16 (1J(Ag,31P) = 297 Hz). IR (nujol, cm-1): 3400-3100br (NH), 1960br, 1900br, 1830br, 1740w, 1434s, 833s, 694s (NO3), 1585w, 1560m (C…C and C…N), 515s, 503s, 491s, 441m, 429m, 419m (Ph). Anal. Calcd for C63H53AgN3O3P3: C, 68.7; H, 4.8; N, 3.8%. Found: C, 68.2; H, 5.0; N, 3.6%. m (CH2Cl2, c = 0.9 M). 0.2 -1mol2cm-1. M.W. (CHCl3, c = 1 x 10-2 m): 682. M.W. (CHCl3, c = 0.7 x 10-2 m): 583.

**[(Ph3P)2Ag(im)2](NO3) 2**. Imidazole (ImH) (0.0136 g, 2.0 mmol) was added to a diethyl ether suspension (100 ml) of [Ag(PPh3)4](NO3) (1.219 g, 1 mmol). After 48 h stirring, the solid was filtered and washed with diethyl ether, affording compound **2** (0.774 g, 93% yield), which was recrystallised from CHCl3/Et2O (4/1). Mp 178-182° C. 1H NMR (CDCl3, 293K):  4.4 (br, 2H, N*H*), 6.90 (br, 4H, 4- and 5-C*H*), 7.3-7.5 (m br, 32H, C6*H*5 and 2-C*H*). 31P NMR (CDCl3, 293K):  9.55. 31P NMR (CDCl3, 223K):  6.03 dd (1J(Ag,31P) = 339 Hz). IR (nujol, cm-1): 3455br (NH), 1774w, 1437m, 841m, 694s (NO3), 1580br, 1550w (C…C and C…N), 515m, 505m, 492s, 442m, 421m (Ph), 280w, 247w, 226w, 205w. Anal. Calcd for C42H38AgN5O3P2: C, 60.7; H, 4.6; N, 8.4%. Found: C, 60.9; H, 5.0; N, 8.2%. m (CH2Cl2, c = 1.2 M). 14.8 -1mol2cm-1. M.W. (CHCl3, c = 1 x 10-2 m): 471. M.W. (CHCl3, c = 0.7 x 10-2 m): 383.

**[(Ph3P)2Ag(2-Me-im)2](NO3) 3**. Derivative **3** was obtained similarly to **2** and recrystallised from CHCl3/Et2O (2/1) (90% yield). Mp167-174° C dec. 1H NMR (CDCl3, 293K):  2.35 (s, 6H, 2-C*H3*), 4.5 (br, 2H, N*H*), 6.92 (br, 4H, 4- and 5-C*H*), 7.3-7.5 (m br, 30H, C6*H*5). 31P NMR (CDCl3, 293K):  9.83. IR (nujol, cm-1): 3160br (NH), 1962br, 1890br, 1831br, 1812w, 1770w, 1433sh, 848m, 692s (NO3), 1585w, 1565m (C…C and C…N), 512sh, 508s, 490s, 428m, 419m (Ph). Anal. Calcd for C44H42AgN5O3P2: C, 61.6; H, 4.9; N, 8.2%. Found: C, 61.4; H, 5.0; N, 7.8%. m (CH2Cl2, c = 1.1 M). 15.0 -1mol2cm-1. M.W. (CHCl3, c = 1.1 x 10-2 m): 511. M.W. (CHCl3, c = 0.7 x 10-2 m): 480.

**[(Ph3P)2Ag(4-Me-im)2](NO3).H2O 4**. Derivative **4** was obtained similarly to **2** and recrystallised from CHCl3/Et2O (2/1) (73% yield). Mp163-167° C dec. 1H NMR (CDCl3, 293K):  2.15 (s, 6H, 4-C*H3*), 2.6 (s, 2H, H2O), 4.8 (br, 2H, N*H*), 7.2-7.5 (m br, 34H, C6*H*5, 2-C*H* and 5-C*H*). 31P NMR (CDCl3, 293K):  6.29. IR (nujol, cm-1): 3220br (NH and OH), 1660br (OH) 1962br, 1890br, 1830br, 1772w, 1430sh, 824m, 695s (NO3), 1584w, 1570m (C…C and C…N), 514s, 504s, 493s, 438m (Ph). Anal. Calcd for C44H44AgN5O4P2: C, 60.3; H, 5.1; N, 8.0%. Found: C, 60.2; H, 5.0; N, 7.8%. m (CH2Cl2, c = 1.1 M). 2.0 -1mol2cm-1.

**[(Ph3P)2Ag(2-Et-im)2](NO3) 5**. Derivative **5** was obtained similarly to **2** and recrystallised from CHCl3/Et2O (4/1) (51% yield). Mp163-168° C dec. 1H NMR (CDCl3, 293K):  1.08t (s, 6H, C*H3*), 2.6 (q, 4H, C*H2*), 6.8 (br, 4H, 4-C*H* and 5-C*H*), 7.2-7.5 (m br, 30H, C6*H*5), 8.0 (br, 2H, N*H*). IR (nujol, cm-1): 3300-2800br (NH), 1960br, 1900br, 1830br, 1773w, 1434s, 826m, 696s (NO3), 1585w, 1560m (C…C and C…N), 515s, 504s, 491s, 442m, 430m, 418w (Ph). Anal. Calcd for C46H46AgN5O3P2: C, 62.3; H, 5.2; N, 7.9%. Found: C, 61.9; H, 5.1; N, 7.6%. m (CH2Cl2, c = 1.1 M). 14.2 -1mol2cm-1.

**[(Ph3P)Ag(1-Me-im)3](NO3) 6**. Derivative **6** was obtained similarly to **2** and recrystallised from CHCl3/Et2O (3/1) (89% yield). Mp 88-90° C dec. 1H NMR (CDCl3, 293K):  3.74 (s, 9H, 1-C*H3*), 6.94 (s, 3H, 4- or 5-C*H*), 7.08 (s, 3H, 4- or 5-C*H*), 7.3-7.5 (m br, 15H, C6*H*5), 7.74 (s, 3H, 2-C*H*). 31P NMR (CDCl3, 293K):  13.2. 31P NMR (CDCl3, 218K):  12.6 d br (1J(Ag,31P) = 642 Hz). IR (nujol, cm-1): 3117w (CH), 1870br, 1836br, 1812w, 1770w, 1744w 1436m, 828m, 697s (NO3), 1521m, 1510w (C…C and C…N511m, 504m, 442m, 431m (Ph). Anal. Calcd for C30H31AgN7O3P: C, 53.3; H, 4.6; N, 14.5%. Found: C, 53.6; H, 4.8; N, 14.3%. m (CH2Cl2, c = 1.0 M). 16.1 -1mol2cm-1.

**[(Ph3P)(Bz-im)2Ag(O2NO)].2H2O 7**. Derivative **7** was obtained similarly to **2** and recrystallised from CHCl3/Et2O (5/1) (66% yield). Mp 182-184° C. 1H NMR (CDCl3, 293K):  4.7 (br, 4H, *H2*O), 7.3-7.5 (m br, 19H, C6*H*5 and C6H4), 7.7 (br, 4H, C6H4), 8.2 (br, 2H, N*H*), 8.4 (s, 2H, 2-C*H*). 31P NMR (CDCl3, 293K):  12.0 br. 31P NMR (CDCl3, 203 K):  10.0 d br (1J(Ag,31P) = 630 Hz). IR (nujol, cm-1): 3200br (NH and OH), 1654 (OH), 1924w 1890w, 1844w (br), 1830w, 1812w, 1790w, 1772w, 1750w, 1734w, 1434s, 830m, 694s (br) (NO3), 1599m, 1585w, 1570w (C…C and C…N) 513m, 502m, 438m,425m (Ph). Anal. Calcd for C32H31AgN5O5P: C, 54.6; H, 4.4; N, 9.9%. Found: C, 54.4; H, 4.1; N, 10.0%. m (CH2Cl2, c = 1.1 M). 0.3 -1mol2cm-1.

**[(Ph3P)2(2-Me-im)Ag(ONO2)] 8**. Derivative **8** was obtained similarly to **3** by using 1 mole of [Ag(PPh3)4]NO3 (1.219 g) and 1 mole of 2-Me-im. After 36 h stirring, the solid was filtered and washed with diethyl ether, affording compound **8**, which wasrecrystallised from CHCl3/Et2O (2/1) (85% yield). Mp>200° C dec. 1H NMR (CDCl3, 293K):  2.15 (s, 3H, 2-C*H3*), 6.77 (s, 4H, 4- and 5-C*H*), 7.1-7.4 (m br, 30H, C6*H*5). 31P NMR (CDCl3, 293K):  7.98. 31P NMR (CDCl3, 218K):  6.51 d (br) (1J(Ag,31P) = 361 Hz), 6.69 s (br). IR (nujol, cm-1): 3000-2700br (NH), 1433sh, 1340s, 1278s, 850m, 825s, 692s (NO3), 1584w, 1565m (C…C and C…N), 512sh, 505s, 490s, 436m, 428m, 419m (Ph), 367m, 277m. Anal. Calcd for C40H36AgN3O3P2: C, 61.9; H, 4.7; N, 5.4%. Found: C, 62.1; H, 4.7; N, 5.2%. m (CH2Cl2, c = 1.0 M). 0.6 -1mol2cm-1.

**[(Cy3P)(2-Me-im)2Ag(ONO2)] 9**. Derivative **9** was obtained similarly to **2** by using equimolar quantities of [Cy3P)2Ag(O2NO] and 2-MeimH, and recrystallised from CHCl3/n-hexane (3/1) (76% yield). Mp 161-164° C. 1H NMR (CDCl3, 293K):  1.2 (m, 15H, C6*H11*), 1.9 (br, 15H, C6*H11*), 2.44 (s, 6H, 2-CH3), 6.92 (s, 4H, 4- and 5-C*H*), 10.0 (br, 2H, N*H*). IR (nujol, cm-1): 3177br (NH), 1448s, 1340m, 674s (NO3), 1560m (C…C and C…N), 527sh, 515m, 472m (Cy). Anal. Calcd for C26H45AgN5O3P: C, 50.8; H, 7.4; N, 11.4%. Found: C, 50.7; H, 7.8; N, 11.7%. m (CH2Cl2, c = 1.1 M). 11.4 -1mol2cm-1.

**[(Cy3P)2Ag(Bz-im)2](NO3).H2O 10.** Derivative **10** was obtained similarly to **8**, and recrystallised from EtOH/Et2O (51% yield). Mp 146-148° C. 1H NMR (CDCl3, 293K):  1.2 (m, 30H, C6*H11*), 1.8 (br, 33H, C6*H11*), 7.3 (m, 4H, C6*H4*), 7.7 (m, 4H, C6*H4*), 8.2 (s, 2H, 2-C*H*), 8.8 (br, 2H, N*H*). 31P NMR (CDCl3, 293K):  32.7 dd (1J(109Ag,31P) = 521 Hz, 1J(107Ag,31P) = 451 Hz). IR (nujol, cm-1): 3400br (OH), 3170br (NH), 1654m (OH) 1450sh, 853m, 669w (NO3), 1601w, 1587w (C…C and C…N), 512m, 489m, 471s, 423s (Cy). Anal. Calcd for C50H80AgN5O4P2: C, 61.0; H, 8.2; N, 7.1%. Found: C, 60.5; H, 8.3; N, 7.5%. m (CH2Cl2, c = 1.2 M). 23.1 -1mol2cm-1.

**[(Ph3P)Ag(2-Me-im)3](CF3CO2) 11.** Derivative **11** was obtained similarly to **2** by reacting 1 mmol of [Ag(Ph3P)4](CF3CO2) with 2 mmol of 2-Me-im, and recrystallised from CHCl3/Et2O (2/1) (88% yield). Mp145-148° C. 1H NMR (CDCl3, 293K):  2.31 (s, 9H, 2-C*H3*), 6.86 (s, 6H, 4- and 5-C*H*), 7.3-7.5 (m br, 15H, C6*H*5), 10.0 (br, 3H, N*H*). 31P NMR (CDCl3, 293K):  11.3 br. 31P NMR (CDCl3, 203K):  4.4 dd (1J(109Ag,31P) = 391 Hz, 1J(107Ag,31P) = 342 Hz), 11.6 dd (1J(109Ag,31P) = 629 Hz, 1J(107Ag,31P) = 545 Hz). IR (nujol, cm-1): 3300-3150br (NH), 1679s, 1440s (CF3CO2), 520s, 502s, 494s, 434m, 422m (Ph), 272m, 180m, 172m. Anal. Calcd for C32H33AgF3N6O2P: C, 52.7; H, 4.6; N, 11.5%. Found: C, 52.6; H, 4.2; N, 10.9%. m (CH2Cl2, c = 1.2 M). 5.3 -1mol2cm-1.

**[(Ph3P)2Ag(4-Me-im)2](CF3CO2) 12**. Derivative **12** was obtained similarly to **11**, and recrystallised from CHCl3/Et2O (2/1) (96% yield). Mp 92° C dec. 1H NMR (CDCl3, 293K):  2.2 (s, 6H, 4-C*H3*), 6.62 (s, 2H, 5-C*H*), 7.3-7.5 (m br, 30H, C6*H*5), 7.6 (s, 2H, 2-C*H*). IR (nujol, cm-1): 3360br (NH), 1676s 1438sh (CF3CO2), 513s, 491sbr, 430m, 420m (Ph), 252m, 247m, 194m. Anal. Calcd for C46H42AgF3N4O2P2: C, 60.7; H, 4.6; N, 6.2%. Found: C, 60.5; H, 4.6; N, 6.1%. m (CH2Cl2, c = 1.1 M). 6.1 -1mol2cm-1.

**[(Ph3P)2Ag(Bz-im)2](CF3CO2)**.**Bz-im 13**.Derivative **13** was obtained similarly to **11**, and recrystallised from CHCl3/Et2O (3/1) (41% yield). Mp114-116° C. 1H NMR (CDCl3, 293K):  7.1 (s, 1H, 2-C*H*), 7.2-7.5 (m br, 38H, C6*H*5 and C6*H4*), 7.7 (br, 4H, C6*H4*), 8.2 (s, 2H, 2-C*H*), 8.3 (br, 3H, N*H*). 31P NMR (CDCl3, 293K):  4.64 br. 31P NMR (CDCl3, 203K):  2.8 d, 1J(Ag,31P) = 300 Hz), 5.5 dd (1J(109Ag,31P) = 241 Hz, (1J(107Ag,31P) = 223 Hz), 6.2 dd (1J(109Ag,31P) = 315 Hz, (1J(107Ag,31P) = 275 Hz). IR (nujol, cm-1): 3150br (NH), 1698s, 1435sh (CF3CO2), 512s, 501s, 424m (Ph), 280m, 270m, 175m. Anal. Calcd for C59H48AgF3N6O2P2: C, 64.4; H, 4.4; N, 7.6%. Found: C, 64.8; H, 4.5; N, 8.0%. m (CH2Cl2, c = 1.3 M). 9.7 -1mol2cm-1.

**[(Ph3P)2Ag(1-Me-im)2](ClO4) 14**. Derivative **14** was obtained similarly to **11** by using 1 mmol of [Ag(PPh3)4]ClO4 and 2 mmol of 1-Me-im, and recrystallised from CHCl3/Et2O (2/1) (67% yield). Mp279° C dec. 1H NMR (CDCl3, 293K):  3.9 (s, 3H, 1-C*H3*), 7.05 (br, 1H, 4- or 5-C*H*), 7.2-7.5 (m br, 32H, C6*H*5 and 4- or 5-CH), 7.7 (br, 1H, 2-CH). IR (nujol, cm-1): 3390br (NH), 1087s (br), 1024m, 998m (ClO4), 512s, 497s, 436m, 426m (Ph). Anal. Calcd for C44H42AgClO4N4P2: C, 59.0; H, 4.7; N, 6.2%. Found: C, 59.2; H, 4.8; N, 6.4%. m (CH2Cl2, c = 1.2 M). 2.2 -1mol2cm-1.

**[(Ph3P)2Ag(Bz-im)2](ClO4)**.**Bz-im 15**. Derivative **15** was obtained similarly to **14**, and recrystallised from CHCl3/Et2O (2/1) (70 % yield). Mp>200° C.  1H NMR (CDCl3, 293K):  2.9 (br, 3H, N*H*), 7.2-7.4 (m, 30H, C6*H5*), 7.5 (m, 6H, C6*H4*), 7.6 (m, 6H, C6*H4*), 8.1 (s, 3H, 2-C*H*). 31P NMR (CDCl3, 293K):  4.3br. 31P NMR (CDCl3, 203K):  3.0 dd (1J(109Ag,31P) = 324 Hz, (1J(107Ag,31P) = 283 Hz), 7.1 br. IR (nujol, cm-1): 3300 br (NH), 1024s, 998m (ClO4), 513s, 501s, 437w, 419m (Ph), 271m, 244w, 228w, 213w. Anal. Calcd for C57H48AgClN6O4P2: C, 63.0; H, 4.4; N, 7.7%. Found: C, 63.3; H, 4.7; N, 7.4%. m (CH2Cl2, c = 1.0 M). 14.5 -1mol2cm-1.

**[(Ph3P)3Ag(2-Me-im)](BF4).2(2-Me-im) 16**.Derivative **16** was obtained similarly to **14** by using 1 mmol of [Ag(PPh3)4]BF4 and 2 mmol of 2-Me-im, and recrystallised from CHCl3/Et2O (2/1) (84 % yield). Mp 169-174° C. 1H NMR (CDCl3, 293K):  2.35 (s, 9H, 2-C*H3*), 6.9 (s, 3H, 4- and 5-C*H*), 7.2-7.8 (m, 30H, C6*H5*), 7.39 (br, 3H, N*H*). IR (nujol, cm-1): 3310 br (NH), 1095s, 1052s, 1024s, 541s, (BF4), 513s, 500s, 437m, 427m (Ph), 269s, 179m. Anal. Calcd for C66H63AgBF4N6P3: C, 64.6; H, 4.8; N, 6.8%. Found: C, 64.7; H, 4.8; N, 7.0%. m (CH2Cl2, c = 1.0 M). 4.1 -1mol2cm-1.

**[(Ph3P)3Ag(1-Me-im)](BF4) 17**. Derivative **17** was obtained similarly to **16**, andrecrystallised from CHCl3/Et2O (2/1) (45% yield). Mp 120-126° C. 1H NMR (CDCl3, 293K):  3.67 (s, 3H, 1-C*H3*), 7.4 (s, 1H, 2-C*H*), 7.2-7.8 (m, 47H, C6*H5*, 4-, and 5-CH). 31P NMR (CDCl3, 293K):  2.2br. IR (nujol, cm-1): 3400-3100s (br) (NH), 1109s, 1078s, 1028s, 543s, 527m (BF4), 512s, 497s, 430m, 419w (Ph), 247m, 162m, 155m. Anal. Calcd for C58H51AgBF4N2P3: C, 65.5; H, 4.8; N, 2.6%. Found: C, 65.4; H, 5.0; N, 2.1%. m (CH2Cl2, c = 0.9 M). 4.8 -1mol2cm-1.

**[(Ph3P)3Ag(Bz-im)](BF4) 18**.Derivative **18** was obtained similarly to **16**, and recrystallised from CHCl3/Et2O (3/1) (60% yield). Mp 199-210° C dec. 1H NMR (CDCl3, 293K):  7.2-7.3 (m, 47H, C6*H5*, and C6H4), 7.4-7.6 (m, 2H, C6H4), 7.8 (br, 1H, 2-C*H*). IR (nujol, cm-1): 3600-3200s (br) (NH), 1089s, 1052s (br), 541m (BF4), 513s, 499s, 437m, 423m (Ph), 271m. Anal. Calcd for C61H51AgBF4N2P3: C, 66.6; H, 4.7; N, 2.6%. Found: C, 66.8; H, 5.0; N, 2.7%. m (CH2Cl2, c = 1.2 M). 5.8 -1mol2cm-1.

**[(Ph3P)3Ag(4-Ph-im)](BF4) 19**.Derivative **19** was obtained similarly to **15**, andrecrystallised from CHCl3/Et2O (3/2) (82% yield). Mp 219-223° C dec. 1H NMR (CDCl3, 293K):  7.1-8.1 (m, 53H, C6*H5*, 2- and 5-CH, NH), 31P NMR (CDCl3, 293K):  7.0 br. 31P NMR (CDCl3, 223K):  5.5dd (1J(109Ag,31P) = 256 Hz, 1J(107Ag,31P) = 222 Hz). IR (nujol, cm-1): 2900-2400 (br) (NH), 1080s, 1064sh, 1053s, 1024sh, 544m, 541m (BF4), 513s, 499s, 438m, 427m (Ph). Anal. Calcd for C63H53AgBF4N2P3: C, 67.2; H, 4.7; N, 2.5%. Found: C, 67.5; H, 5.0; N, 2.3%. m (CH2Cl2, c = 1.1 M). 0.2 -1mol2cm-1.

**[(Ph3P)(1-Me-im)Ag(O2SOCH3)]2 20**. Derivative **20** was obtained similarly to **1** by using 1 mmol of [(Ph3P)Ag(O2SOCH3)] and 1 mmol of 1-Me-im, and recrystallised from CHCl3/Et2O (3/2) (73 % yield). Mp 121-124° C dec. 1H NMR (CDCl3, 293K): . 1H NMR (CDCl3, 293K):  2.62 (s, 3H, SO3C*H3*), 3.74 (s, 3H, 1-C*H3*) 6.92, 7.07 (2s, 2H, 4- and 5-C*H*), 7.41 (s, 1H, 2-C*H*), 7.4-7.6 (m, 15H, C6*H5*). 31P NMR (CDCl3, 293K):  12.1br. 31P NMR (CDCl3, 223K):  14.05 dd (1J(109Ag,31P) = 740 Hz, 1J(107Ag,31P) = 641 Hz). IR (nujol, cm-1): 3120w (CH), 1188s, 1170s (SO3), 520s, 498s, 437w (Ph). Anal. Calcd for C23H24AgN2O3PS: C, 48.9; H, 4.6; N, 5.0; S, 5.7%. Found: C, 48.9; H, 4.5; N, 5.3; S, 5.9%. m (CH2Cl2, c = 1.0 M). 3.4 -1mol2cm-1.

**[(Ph3P)(im)Ag(-O2N)]2 21**. Derivative **21** was obtained similarly to **1** by using 1 mmol of [(Ph3P)Ag(O2N)]2 and 1 mmol of im, and recrystallised from CHCl3/Et2O (3/2) (75% yield). Mp 138-141° C dec. 1H NMR (CDCl3, 293K):  6.99 (s, 1H, 4- and 5-C*H*), 7.62 (s, 2H, 2-C*H*), 9.0 (s br, 1H, N*H*), 7.3-7.5 (m, 15H, C6*H5*), 31P NMR (CDCl3, 293K):  12.9br. 31P NMR (CDCl3, 201K):  9.0 dd (1J(109Ag,31P) = 480 Hz, 1J(107Ag,31P) = 416 Hz), 12.6 dd (1J(109Ag,31P) = 692 Hz, 1J(107Ag,31P) = 599 Hz). IR (nujol, cm-1): 3100 (br) (NH), 1331m, 1305m, 1199w, 823m (NO2), 516s, 494s, 433s (Ph). Anal. Calcd for C21H19AgN3O2P: C, 51.8; H, 4.1; N, 9.0%. Found: C, 52.1; H, 3.9; N, 8.7%. m (CH2Cl2, c = 1.0 M). 0.2 -1mol2cm-1.

**[(Ph3P)(1-Me-im)Ag(ONO)]2 22**. Derivative **22** was obtained similarly to **21**, and recrystallised from CHCl3/Et2O (1/1) (88 % yield). Mp 173-176° C dec. 1H NMR (CDCl3, 293K):  3.65 (s, 3H, C*H3*) 6.86, 6.90 (2s, 2H, 4- and 5-C*H*), 7.40 (s, 1H, 2-C*H*), 7.3-7.4 (m, 15H, C6*H5*). 31P NMR (CDCl3, 293K):  12.8br. IR (nujol, cm-1): 3044sh (CH), 1309m, 1231m, 846w, 827m (NO2), 518s, 499s, 433m (Ph). Anal. Calcd for C22H21AgN3O2P: C, 53.0; H, 4.2; N, 8.4%. Found: C, 53.3; H, 4.1; N, 7.9%. m (CH2Cl2, c = 1.0 M). 1.0 -1mol2cm-1.

**[(Ph3P)(4-Ph-im)Ag(ONO)]2 23**. Derivative **23** was obtained similarly to **21**, and recrystallised from CHCl3 (89 % yield). Mp 145-148° C dec. 1H NMR (CDCl3, 293K):  7.2-7.6 (m, 21H, C6*H5* and 5-C*H*), 7.66 (s, 1H, 2-C*H*). 31P NMR (CDCl3, 293K):  10.6br. IR (nujol, cm-1): 3160 (br) (NH), 3060m, (CH) 1345m, 1302w, 1227m, 832m, 817m (NO2), 513s, 501s, 439m, 430w, 423m (Ph). Anal. Calcd for C27H23AgN3O2P: C, 57.9; H, 4.1; N, 7.5%. Found: C, 58.1; H, 4.2; N, 7.3%. m (Acetone, c = 1.0 M). 20.0 -1mol2cm-1.

**[(Ph3P)(Bz-im)Ag(ONO)]2 24**. Derivative **24** was obtained similarly to **21**, and recrystallised from CHCl2/n-hexane (1/1) (84 % yield). Mp 173-176° C dec. 1H NMR (CDCl3, 293K):  7.2-7.8 (m, 19H, C6*H5* and C6*H4*), 7.24 (s, 1H, 2-C*H*). 31P NMR (CDCl3, 293K):  11.5br. IR (nujol, cm-1): 3053w (CH), 1303m, 1229s, 832w, 819w (NO2), 512s, 502s, 439m, 430w, 423w (Ph). Anal. Calcd for C25H21AgN3O2P: C, 56.2; H, 4.0; N, 7.7%. Found: C, 56.5; H, 4.2; N, 7.3%. m (DMSO, c = 1.0 M). 14.4 -1mol2cm-1.
